1 Full Title; Molecular Dynamics simulations of Alzheimer's variants, R47H and R62H,  
2 in TREM2 provide evidence for structural alterations behind functional changes

3  
4 Short Title; Molecular Dynamics simulations of Alzheimer's variants in TREM2

5  
6  
7 Authors;  
8 Georgina E Menzies, Rebecca Sims, Julie Williams

9  
10 UK Dementia Research Institute at Cardiff and the MRC Centre for Neuropsychiatric  
11 Genetics and Genomics, Cardiff University, Hadyn Ellis Building, Maindy Road,  
12 Cardiff

13  
14  
15 **Abstract:**

16 There is strong evidence supporting the association between Alzheimer's disease  
17 (AD) and protein-coding variants, R47H and R62H in *TREM2*. The TREM2 protein is  
18 an immune receptor found in brain microglia. A structural alteration could therefore  
19 have a large effect on the protein. Crystallised structures were used as a base for both  
20 WT and mutated proteins. These subjected to 300ns of molecular dynamic simulation  
21 (MD). Results suggest structural alterations in both mutated forms of TREM2. A large  
22 change was noted in the R47H simulation in the complementarity-determining region  
23 two (CDR2) binding loop, a proposed binding sites for ligands such as APOE, a  
24 smaller change was observed in the R62H model. These differing levels of structural  
25 impact could explain the *in vitro* observed differences in TREM2-ligand binding.

26  
27  
28 **Author Summary:**

29 A number of mutations have been found in the TREM2 protein in populations of  
30 people with Alzheimer's and other dementias. Two of these mutations are similar in  
31 that the both cause the same coding change in the same domain of the protein.  
32 However, they both cause a very different result in terms of risk and in vitro observed  
33 changes. Why these two similar mutations are so different is largely unknown. Here  
34 we have used a *in silico*, simulation, approach to understanding the structural  
35 changes which occur in both of the mutations. Our results suggest that the mutation  
36 which carries a higher risk, but it less commonly observed, has a much larger impact  
37 on the protein structure than the mutation which is thought to be less damaging. This  
38 structural change is observed at a part of the protein which is thought to code for a  
39 binding loop and a change here could have a big impact on the proteins function.  
40 Further studies to investigate this binding loop could help not only a better  
41 understanding of TREM2's role in the onset of dementia but also possibly provide a  
42 target for therapeutics.

43

44

45  
46  
47  
48  
49  
50  
51  
52  
53  
54  
55

**Introduction:**

The world health organisation estimate there will be 50 million dementia sufferers worldwide by 2050, with Alzheimer’s disease (AD) being the most common form [1]. Genetic studies are continually adding to the list of confirmed Alzheimer associated genes, one such study by Sims *et al* recently reported the first genome-wide evidence for the coding variant R62H in triggering receptor expressed on myeloid cells 2 (TREM2) [2]. This and other recent genetic studies have implicated the strong role of the immune system and microglial cells in the development and progression of AD [3].

56  
57  
58  
59  
60  
61  
62  
63  
64  
65  
66  
67  
68  
69  
70  
71  
72  
73  
74

The *TREM2* gene includes two genome-wide significant coding variants (R62H (Odds ratio=1.67, P=1.55×10<sup>-14</sup>) and R47H (Odds ratio=2.90, P=2.1×10<sup>-12</sup>) which are associated with an increased risk of developing AD [4–7]. Although a number of variants have been implicated in disease, they are yet to reach the level of genome-wide significance. A greater understanding of the impact of these identified variants and their impact upon the function of TREM2 in immune pathways can help with understanding how TREM2 impacts upon the development of neurodegenerative disease. TREM2 is an innate immune receptor protein which is expressed on the surface of dendritic cells, macrophages and microglia and has been shown to play an anti-inflammatory role [8]. It contains an extracellular V-type immunoglobulin (Ig) domain, a transmembrane domain which associates with the adaptor protein DAP12 for signalling and a cytoplasmic tail [9,10]. Recent studies by Zhao *et al* have shown wildtype TREM2 to bind directly to Aβ with mutated forms of TREM2 showing a reduced rate of binding [11]. TREM2 has also been reported to bind to several ligands such as Apolipoprotein E (APOE) and Apolipoprotein J (APOJ) [12–14]. Subtle differences in protein secondary structure and ligand binding of R47H mutated TREM2 have previously been reported, though how these binding changes occur are not completely understood [10].

75  
76  
77  
78  
79  
80  
81  
82  
83

The AD associated variants are found on the surface of TREM2, this includes T66M, D87N that show suggestive association with disease and have been shown to affect the binding of ligands and other surface properties. In addition to AD, an independent number of TREM2 mutations are associated with Nasu-Hakola disease (NHD). NHD susceptibility variants (such as Q33X and Y38C [15]) are buried residues which cause complete loss of function. This segregation of disease phenotypes, table 1, when a mutation occurs within the same protein, suggests a differing effect on both the structure and function of TREM2 [10].

84 *Table 1 - Known variants of TREM2 and the suggested impact [10,16]*

| <b>TREM2 Variant</b> | <b>Surface Expression Changes</b> | <b>Ligand Binding Changes</b> | <b>Signalling Response</b> | <b>% solvent Accessibility</b> | <b>Implicated in</b> |
|----------------------|-----------------------------------|-------------------------------|----------------------------|--------------------------------|----------------------|
| <b>Y38C</b>          | Reduced                           | Ablated                       | N/A                        | 7.6                            | NHD                  |
| <b>R47H</b>          | None                              | Reduced                       | Reduced                    | 32.5                           | AD                   |
| <b>R62H</b>          | None                              | Reduced                       | Reduced                    | 48.0                           | AD                   |
| <b>T66M</b>          | Reduced                           | Ablated                       | None                       | 0.0                            | NHD                  |
| <b>N68K</b>          |                                   |                               |                            | 77.2                           | AD                   |
| <b>D87N</b>          | None                              | Reduced                       | Increased                  | 66.7                           | AD                   |

|              |         |           |           |      |     |
|--------------|---------|-----------|-----------|------|-----|
| <b>T96K</b>  | Reduced | Increased | Increased | 26.7 | AD  |
| <b>V126G</b> |         |           |           | 0.0  | NHD |

85

86 In order to investigate the structural impact of the R47H and R62H mutations and  
87 predict possible loss-of-function we carried out an *in silico* study of the binding  
88 domain of the protein containing the mutations. Here we describe the results of this  
89 study and in particular the similarities and differences between the two models.  
90 Results suggest a greater effect on the binding loops by the R47H mutation, fitting  
91 with previous studies [10].

92

93

94

### 95 **Results:**

96 The wildtype TREM2 protein's extracellular ligand binding domain (ECD) contains  
97 amino acids 19-134 which have been crystallised from a mammalian cell system  
98 [10]. The rest of TREM2 contains a signalling peptide (1-18), a membrane spanning  
99 region (175-195) and a cytosolic tail (196-230) [17]. These all form important roles in  
100 the protein but as they are not suggested to be used in the binding process, the  
101 process which is affected by the AD risk mutations, and they are not crystallised,  
102 they have been excluded from this study. The domain under investigation is a V-type  
103 Ig domain which contains nine B-strands and two short  $\alpha$ -helices, all of which are  
104 characteristic of an Ig protein domain. Both mutations, R47H and R62H, can be  
105 found on the protein surface, which is suggested to be how they affect TREM2's  
106 binding abilities, in particular its ability to bind to APOE and APOJ [12,13]. The Have  
107 your Protein Explained server (HoPE) was used to investigate the possible  
108 mutational effects prior to any simulations being run [18]. Results from the server  
109 suggest that the wildtype amino acid (arginine) at position 47 forms a hydrogen bond  
110 with amino acids at positions 66 (threonine) and 67 (histidine) which would not be  
111 possible with the histidine mutation in this position. These bonds may be important  
112 for protein structural integrity. The wildtype residue is conserved at position 47,  
113 though histidine is observed here in some species. Residue 62 on the other hand is  
114 less well conserved, but histidine is not observed here. There is an obvious loss of  
115 charge and size with mutated R62H, shown schematically in figure 1. The SIFT  
116 online tool was used to predict the tolerance of the two mutations in the protein, this  
117 does not predict the effect of binding, or function, but whether the mutation will be  
118 tolerated in the protein structure. Results from this show the R47H mutation to be  
119 tolerated with a score of 0.06 and the R62H mutation to be tolerated with a score of  
120 0.10, this was based on 13 sequences. A score of  $<0.05$  would result in a damaging  
121 prediction [19]. The I-mutant server results showed a decrease in stability for both  
122 the R47H and R62H mutations [20].

123

124

125

126

127 *Figure 1 – Schematics of the (a) wildtype and (b) mutated amino acids*

128

129 MD simulations were run, in triplicate, for the WT and mutated proteins, the stability  
130 of the simulations were checked, and volume, pressure and root mean square  
131 deviation (RMSD) remained stable throughout thus giving confidence in the model  
132 systems. Figure 2 depicts the structure of TREM2 which has been modelled and run

133 through the MD simulations. The complementarity-determining region (CDR) loops,  
134 which are suggested to be key for the ligand binding process [21,22], are coloured  
135 as follows; red for the CDR1, green for CDR2 and purple for the CDR3 loop. The two  
136 mutated sites are shown in dark blue, both are close to the CDR1 and CDR2 loops,  
137 with R47H actually being found in the CDR1 loop.

138  
139  
140  
141  
142  
143

*Figure 2 – Wild type TREM2, the structure is depicted as a cartoon style with secondary structure colouring. CDR loops are coloured as follows; CDR1 = red, CDR2 = green, CDR3 = purple, the position of the two mutated sites are coloured in dark blue and shown in full.*

144  
145 Mutations could be impacting the local or the global structure of TREM2. Local  
146 structural changes were first investigated in the three molecular models. The region  
147 surrounding both mutations, amino acids 43-65 were viewed, figure 3. The R62H  
148 mutation alters this local structure with a shift in the beta sheet and a large  
149 movement of the random coil. The R47H mutation does not appear to alter this local  
150 structure in any way. As well as altering the local structure the flexibility of the  
151 individual residue, i.e. the amount of movement it has, was also altered for the R62H  
152 mutation. Results show the WT and R47H have a flexibility of 0.23 +/- 0.02 and 0.01  
153 respectively at amino acid 62, the R62H mutation on the other hand has a reduced  
154 flexibility of 0.17 +/- 0.01. There is also, to a lesser extent, a reduction of flexibility  
155 across neighbouring amino acids which surround the R62H mutation.

156  
157 Arginine, which is present in the wildtype protein at both positions, is a long and  
158 stretching amino acid with a chain of carbons and nitrogens. Histidine, which is the  
159 mutated form of both variants, is a ring structure, with less availability for hydrogen  
160 bonding. MD simulation results show a change in positioning of the wildtype to  
161 mutated amino acid, the wildtype protruding from the molecule in both cases and the  
162 mutated amino acid being visually far more buried within the structure, figure 3 (d-g).

163  
164  
165  
166  
167  
168  
*Figure 3 – Graphs of the flexibility changes for the wildtype and mutated proteins at both sites as well as the point specific SASA are shown in a and b. c depicts the local level structural alteration with the type in secondary structure colours, R47H in red and R62H in blue. d-g show the wildtype and mutated acids positioning for the R47H wildtype, mutation, and the R62H wildtype and mutation respectively.*

169  
170 Solvent accessible surface area (SASA) for the whole protein, and the individual  
171 mutated residues were measured. Overall SASA was reduced from 71 to 70, this  
172 small change is not significant and may not have any effect on the protein function.  
173 Amino acid specific SASA was measured for the WT and mutated proteins, at the 47  
174 and 62 sites. Here a SASA change can be seen at the mutated site in each protein,  
175 with a reduction of SASA, figure 3b.

176  
177 A final measurement of the distance between the two mutation sites (taken to show  
178 structural shrinkage in the protein) was measured. Again, a reduction was seen here  
179 in the R47H and R62H mutations when compared to the WT.

180  
181 Significant structural alteration can be seen in the CDR2 loop, figure 4 shows the  
182 R47H mutation to cause a loss of beta sheet and a changing of alpha helix position

183 in this binding loop. The effect of the R62H mutation is subtler, where there is a  
184 change in loop structure to the left and right of the alpha helix. There is a further  
185 effect on the flexibility of the loop, figure 4c, here the mutations differ with the R47H  
186 becoming more flexible and the R62H mutation less flexible, when compared to the  
187 wild type simulation. Significant structural alteration can be seen in the CDR2 loop,  
188 figure 4 which contains the results of all three simulations shows the R47H mutation  
189 to cause a loss of beta sheet and a changing of alpha helix position in this binding  
190 loop. The effect of the R62H mutation is subtler, where there is a change in loop  
191 structure to the left and right of the alpha helix. All three images show the loop in the  
192 same position and therefore should all be identical if no structural change was  
193 observed.

194

195 *Figure 4 - The TREM2 CDR2 loop which spans amino acids 67 to 81, (a) wild type, (b) R47H mutation, (c) R62H mutation*  
196 *(d) the RMSF – or flexibility of the residues in the CDR2 loop.*

197

198

## 199 **Discussion:**

200

201 In this study we present structural findings and subsequent functional predictions  
202 from two AD associated genome-wide significant mutations in TREM2. The R62H  
203 mutation which is more common in the Caucasian population with OR=1.67;  
204  $P=1.55 \times 10^{-14}$  [2] whereas the rarer mutation, R47H, carries a far greater risk (OR=  
205 2.90;  $P=2.1 \times 10^{-12}$  [4]). Both mutations are found within exon 2, the region which is  
206 predicted to encode for the ligand-binding domain, and both are missense mutations  
207 causing a coding change from the wild type arginine to a histidine. Previous studies  
208 have shown that disruptions to the protein in exon 2 are likely to cause TREM2  
209 signalling problems or a loss or a decrease in protein function. The functional impact  
210 of both variants has been discussed at an *in vitro* and *in vivo* level, but here we  
211 present a study which aims to identify the structural cause behind the functional  
212 alterations. Previous studies have identified R47H as having a greater functional  
213 effect than R62H even though the same mutation is observed and they are in very  
214 close proximity to each other, why this difference happens is largely unknown [10].  
215 Other TREM2 variants have been suggested to have an effect in AD, but so far only  
216 these two coding variants have reached genome-wide significance and so are the  
217 only two studied here [10,23]. Previous studies have looked into the structure of  
218 TREM2, one such study, published in 2014, by Abduljaleel *et al* performed MD  
219 simulations on the R47H variant. Their simulations ran for just 10ns and they  
220 presented results which suggested a possible alteration to binding loops and overall  
221 stability alteration. This short simulation time may not have been long enough to view  
222 any large or distal impact and this study builds upon those results and expands their  
223 hypotheses [24].

224

225 The differing results from SIFT and I-Mutant suggest an overall tolerance of the  
226 mutation, but a local structural shift. The overall tolerance of the mutations is key, the  
227 proteins remaining stable, and tolerating the mutation means the mutated protein is  
228 likely to perform a partial function as is predicted *in vitro*. The protein is also likely to  
229 be expressed on the cell surface still, as is also predicted. This is supported by the  
230 simulation results which suggest no change in the global protein flexibility or SASA.  
231 The local structure shows a greater change, beginning with the positioning of the  
232 amino acid. The wildtype for both mutations are found outstretched from the proteins

233 binding domain, here they could perform key functions in binding, it has been  
234 suggested that the positive amino acids such as these play an important role [25].  
235 The mutated residues are neutral in charge, provide less opportunity for hydrogen  
236 bonding and are buried within the binding domain, this alone causes an impact on  
237 TREM2's ability to bind to ligands such as APOE. Further to this local change, both  
238 mutations are found in the vicinity of the binding loops of CDR1 and CDR2, R47H  
239 lies on CDR1 and R62H between the two loops. These, and other putative AD  
240 mutations, are found on the surface of the protein where they may affect TREM2's  
241 ability to bind and function.

242  
243 Solvent-accessible surface area, SASA, is important when considering rates of  
244 reactions which require a protein-protein or protein-ligand interaction and so a  
245 change in the SASA of either of these two amino acids which could be key in the  
246 binding process should be considered a detrimental effect and results showed a  
247 reduction in SASA at the mutated residue for both models [26]. A further result of  
248 note is the reduction the distance between the amino acids for the R62H model, this  
249 measurement suggests a reduction in overall protein size and a loss of shape, two  
250 things which are again key for function. Sudom *et al* recently published a paper  
251 which showed mutated R47H protein to contain a remodelled helix in the CDR2 loop,  
252 though their crystal structure is missing residues 76-81[17]. This study supports an  
253 altered helix structure in the CDR2 loop, we also see a loss of the beta sheet  
254 structure which is replaced by a random coil. A random coil is far more variable and  
255 could explain why they were unable to resolve this region of the protein and the  
256 crystal structure is missing this region. This TREM2 domain also contains three  
257 possible N-glycosylation sites, one of which is at position 79, the alteration in  
258 structure here could be effecting the ability of TREM2 to undergo translational  
259 modification and could explain the altered glycosylation seen in vitro in the R47H  
260 mutated form [27].

261  
262 Park *et al* recently showed that the R47H mutation in TREM2 resulted in a  
263 decreased protein stability, based on our models this may due to the large alteration  
264 in the CDR2 loop structure [27]. Another study by Atagi *et al* presented strong  
265 evidence for the binding of TREM2 to APOE, and more interestingly a lack of binding  
266 when the R47H mutation was present [14], this is further supported by Yeh *et al* who  
267 measured a decrease in TREM2's ability to bind CLU/APOJ and APOE when the  
268 R47H and R62H mutations were present. Their results support our difference in  
269 binding loop loss between the two mutations as they observed less of a decrease in  
270 binding with the R62H mutation [12]. This binding loop degradation we observed  
271 may be the key to understanding the functional effect these mutations are having on  
272 the protein.

273  
274 The evidence shown here correlates with previous studies which indicate a binding  
275 change when the R47H mutation is present. We present novel findings which show  
276 the R62H mutation to have a structural effect on the same region of the protein albeit  
277 to a lesser extent. This provides insight and support to the studies which show less  
278 of a decrease in binding ability with the R62H mutated protein compared to the R47H  
279 mutated form. Understanding the structural and functional changes which occur in  
280 this AD associated protein increase our knowledge of the mechanisms behind the  
281 processes which cause AD and as a result provide more novel drug and therapeutic  
282 targets.

283  
284

### 285 **Materials and Methods:**

286 The immunoglobulin domain for the TREM2 protein has previously been crystallised  
287 [10], both mutations were added to the structure using the modify protein function in  
288 the Accelrys software, Discovery studio. The wildtype protein (WT) and the two  
289 mutated structures were subjected to over 300ns of molecular dynamics (MD)  
290 simulations. MD was carried out using the GROMACS [28] software suit using the  
291 Amber03 [29] in built force field parameters. All protein structures were placed in a  
292 cubic box, solvated using TIP3P water molecules and neutralised using Cl<sup>-</sup> ions. The  
293 particle mesh ewald (PME) method was used to treat long-range electrostatic  
294 interactions and a 1.4 nm cut-off was applied to Lennard–Jones interactions. All of  
295 the simulations were carried out in the NPT ensemble, with periodic boundary  
296 conditions and at a temperature of 310K. There were three-steps to each simulation.  
297 1; Energy minimisation, using the steepest decent method and a tolerance of  
298 1000KJ<sup>-1</sup> nm<sup>-1</sup>. 2; Warm up stage of 25 000 steps at 0.002ps steps, during this stage  
299 atoms were restrained to allow the model to settle. 3; Finally, a MD stage run for a  
300 total of 300ns. Root mean square deviation (RMSD) was monitored along with the  
301 total energy, pressure and volume of the simulation to check for stability.

302

303 Resulting structures were analysed for flexibility using the gmx rmsf and hydrogen  
304 bonding using gmx hbond (both available within the GROMACS suite) all proteins  
305 were visualised for structural differences using VMD. Further to this prediction of the  
306 functional effect and stability analysis was carried out using three online servers,  
307 HoPE, SIFT and I-mutatnt [18–20,30]. HoPE analyses the impact of a mutation,  
308 taking into account structural impact, and contact such as possible hydrogen  
309 bonding and ionic interactions. The SIFT software predicts tolerated and deleterious  
310 SNPs and identifies any impact of amino acid substitution on protein function and  
311 lastly, I-Mutant is a neural-network based prediction of protein stability changes.

312

313 Statistical normality in distributions such a rmsd, energy, pressure, volume etc, were  
314 tested for using the Anderson-Darling test. All were not normally distributed and so  
315 all statistical differences between the wildtype and mutated simulations were  
316 calculated using the Mann-Whitney *U* test.

317

### 318 **Acknowledgements**

319 Part-funded by the European Regional Development Fund through the Welsh  
320 Government

321

- 322  
323 1. World Health Organization. Dementia. Fact sheet N°362. May 2017. World  
324 Health Organization. 2017.
- 325 2. Sims R, van der Lee SJ, Naj AC, Bellenguez C, Badarinarayan N, Jakobsdottir  
326 J, et al. Rare coding variants in PLAG2, ABI3, and TREM2 implicate  
327 microglial-mediated innate immunity in Alzheimer's disease. *Nat Genet.*  
328 2017;49: 1373–1384. doi:10.1038/ng.3916
- 329 3. Jevtic S, Sengar AS, Salter MW, McLaurin J. The role of the immune system in  
330 Alzheimer disease: Etiology and treatment. *Ageing Res Rev.* 2017;40: 84–94.  
331 doi:10.1016/j.arr.2017.08.005
- 332 4. Jonsson T, Stefansson H, Ph D SS, Jonsdottir I, Jonsson P, Snaedal J, et al.  
333 Variant of TREM2 Associated with the Risk of Alzheimer's Disease. *N Engl J*  
334 *Med.* 2012;
- 335 5. Guerreiro R, Wojtas A, Bras J, Carrasquillo M, Rogaeve E, Majounie E, et al.  
336 TREM2 variants in Alzheimer's disease. *N Engl J Med.* 2013;368.  
337 doi:10.1056/NEJMoa1211851
- 338 6. Rosenthal SL, Bamne MN, Wang X, Berman S, Snitz BE, Klunk WE, et al.  
339 More evidence for association of a rare TREM2 mutation (R47H) with  
340 Alzheimer's disease risk. *Neurobiol Aging.* 2015;36: 2443.e21-2443.e26.  
341 doi:10.1016/j.neurobiolaging.2015.04.012
- 342 7. Lambert J-CC, Ibrahim-Verbaas CA, Harold D, Naj AC, Sims R, Bellenguez C,  
343 et al. Meta-analysis of 74,046 individuals identifies 11 new susceptibility loci for  
344 Alzheimer's disease. *Nat Genet.* 2013;45: 1452–1458. doi:10.1038/ng.2802
- 345 8. Filipello F, Morini R, Corradini I, Zerbi V, Canzi A, Michalski B, et al. The  
346 Microglial Innate Immune Receptor TREM2 Is Required for Synapse  
347 Elimination and Normal Brain Connectivity. *Immunity.* 2018;48: 979–991.e8.  
348 doi:10.1016/j.immuni.2018.04.016
- 349 9. Allcock RJN, Barrow AD, Forbes S, Beck S, Trowsdale J. The human TREM  
350 gene cluster at 6p21.1 encodes both activating and inhibitory single IgV  
351 domain receptors and includes NKp44. *European Journal of Immunology.*  
352 2003. pp. 567–577. doi:10.1002/immu.200310033
- 353 10. Kober DL, Alexander-Brett JM, Karch CM, Cruchaga C, Colonna M, Holtzman  
354 MJ, et al. Neurodegenerative disease mutations in TREM2 reveal a functional  
355 surface and distinct loss-of-function mechanisms. *Elife.* 2016;5.  
356 doi:10.7554/eLife.20391
- 357 11. Zhao Y, Wu X, Li X, Jiang LL, Gui X, Liu Y, et al. TREM2 Is a Receptor for  $\beta$ -  
358 Amyloid that Mediates Microglial Function. *Neuron.* 2018;97: 1023–1031.e7.  
359 doi:10.1016/j.neuron.2018.01.031
- 360 12. Yeh FL, Wang Y, Tom I, Gonzalez LC, Sheng M. TREM2 binds to  
361 apolipoproteins, including APOE and CLU/APOJ, and thereby facilitates  
362 uptake of amyloid-beta by microglia. *Neuron.* 2016;91.  
363 doi:10.1016/j.neuron.2016.06.015
- 364 13. Jendresen C, Årskog V, Daws MR, Nilsson LNG. The Alzheimer's disease risk  
365 factors apolipoprotein E and TREM2 are linked in a receptor signaling  
366 pathway. *J Neuroinflammation.* 2017;14: 59. doi:10.1186/s12974-017-0835-4
- 367 14. Atagi Y, Liu C-. C, Painter MM, Chen X-. F, Verbeeck C, Zheng H, et al.  
368 Apolipoprotein E is a ligand for triggering receptor expressed on myeloid cells  
369 2 (TREM2). *J Biol Chem.* 2015;290. doi:10.1074/jbc.M115.679043
- 370 15. Dardiotis E, Siokas V, Pantazi E, Dardioti M, Rikos D, Xiromerisiou G, et al. A  
371 novel mutation in TREM2 gene causing Nasu-Hakola disease and review of



- 372 the literature. *Neurobiol Aging*. 2017;53: 194.e13-194.e22.  
373 doi:10.1016/j.neurobiolaging.2017.01.015
- 374 16. Ulrich JD, Ulland TK, Colonna M, Holtzman DM. Elucidating the Role of  
375 TREM2 in Alzheimer's Disease. *Neuron*. Elsevier Inc.; 2017;94: 237–248.  
376 doi:10.1016/j.neuron.2017.02.042
- 377 17. Sudom A, Talreja S, Danao J, Bragg E, Kegel R, Min X, et al. Molecular basis  
378 for the loss-of-function effects of the Alzheimer's disease–associated R47H  
379 variant of the immune receptor TREM2. *J Biol Chem*. 2018;  
380 jbc.RA118.002352. doi:10.1074/jbc.RA118.002352
- 381 18. Venselaar H, Te Beek TAH, Kuipers RKP, Hekkelman ML, Vriend G. Protein  
382 structure analysis of mutations causing inheritable diseases. An e-Science  
383 approach with life scientist friendly interfaces. *BMC Bioinformatics*. 2010;11:  
384 548. doi:10.1186/1471-2105-11-548
- 385 19. Vaser R, Adusumalli S, Leng SN, Sikic M, Ng PC. SIFT missense predictions  
386 for genomes. *Nat Protoc*. 2016;11: 1–9. doi:10.1038/nprot.2015.123
- 387 20. Capriotti E, Fariselli P, Casadio R. I-Mutant2.0: Predicting stability changes  
388 upon mutation from the protein sequence or structure. *Nucleic Acids Res*.  
389 2005;33. doi:10.1093/nar/gki375
- 390 21. Gattis JL, Washington AV, Chisholm MM, Quigley L, Szyk A, McVicar DW, et  
391 al. The structure of the extracellular domain of triggering receptor expressed  
392 on myeloid cells like transcript-1 and evidence for a naturally occurring soluble  
393 fragment. *J Biol Chem*. 2006;281: 13396–13403. doi:10.1074/jbc.M600489200
- 394 22. Radaev S, Kattah M, Rostro B, Colonna M, Sun PD. Crystal Structure of the  
395 Human Myeloid Cell Activating Receptor TREM-1. *Structure*. 2003;11: 1527–  
396 1535. doi:10.1016/j.str.2003.11.001
- 397 23. Cuyvers E, Bettens K, Philtjens S, Van Langenhove T, Gijssels I, van der  
398 Zee J, et al. Investigating the role of rare heterozygous TREM2 variants in  
399 Alzheimer's disease and frontotemporal dementia. *Neurobiol Aging*. Elsevier  
400 Ltd; 2014;35: 726.e11-726.e19. doi:10.1016/j.neurobiolaging.2013.09.009
- 401 24. Abduljaleel Z, Al-Allaf FA, Khan W, Athar M, Shahzad N, Taher MM, et al.  
402 Evidence of Trem2 variant associated with triple risk of alzheimer's disease.  
403 *PLoS One*. 2014;9. doi:10.1371/journal.pone.0092648
- 404 25. Zhong L, Wang Z, Wang D, Wang Z, Martens YA, Wu L, et al. Amyloid-beta  
405 modulates microglial responses by binding to the triggering receptor expressed  
406 on myeloid cells 2 (TREM2). *Mol Neurodegener*. 2018;13.  
407 doi:10.1186/s13024-018-0247-7
- 408 26. Zheng C, Wong CF, McCammon JA. Fluctuation of the solvent-accessible  
409 surface area of tuna ferrocycytochrome c. *Biopolymers*. 1990;29: 1877–1883.  
410 doi:10.1002/bip.360291418
- 411 27. Park JS, Ji IJ, Kim DH, An HJ, Yoon SY. The Alzheimer's disease-associated  
412 R47H variant of TREM2 has an altered glycosylation pattern and protein  
413 stability. *Front Neurosci*. 2017;10: 1–10. doi:10.3389/fnins.2016.00618
- 414 28. Pronk S, P??ll S, Schulz R, Larsson P, Bjelkmar P, Apostolov R, et al.  
415 GROMACS 4.5: A high-throughput and highly parallel open source molecular  
416 simulation toolkit. *Bioinformatics*. 2013;29: 845–854.  
417 doi:10.1093/bioinformatics/btt055
- 418 29. D.A. Case T.E. Cheatham, III, C.L. Simmerling, J. Wang, R.E. Duke, R. Luo,  
419 R.C. Walker, W. Zhang, K.M. Merz, B. Roberts, B. Wang, S. Hayik, A.  
420 Roitberg, G. Seabra, I. Kolossvai, K.F. Wong, F. Paesani, J. Vanicek, J. Liu, X.  
421 Wu, S.R. Brozell, T. Steinbrec TAD. AMBER 11. University of California, San

- 422 Francisco; 2010.  
423 30. Bava KA. ProTherm, version 4.0: thermodynamic database for proteins and  
424 mutants. Nucleic Acids Res. 2004;32: 120D–121. doi:10.1093/nar/gkh082  
425  
426

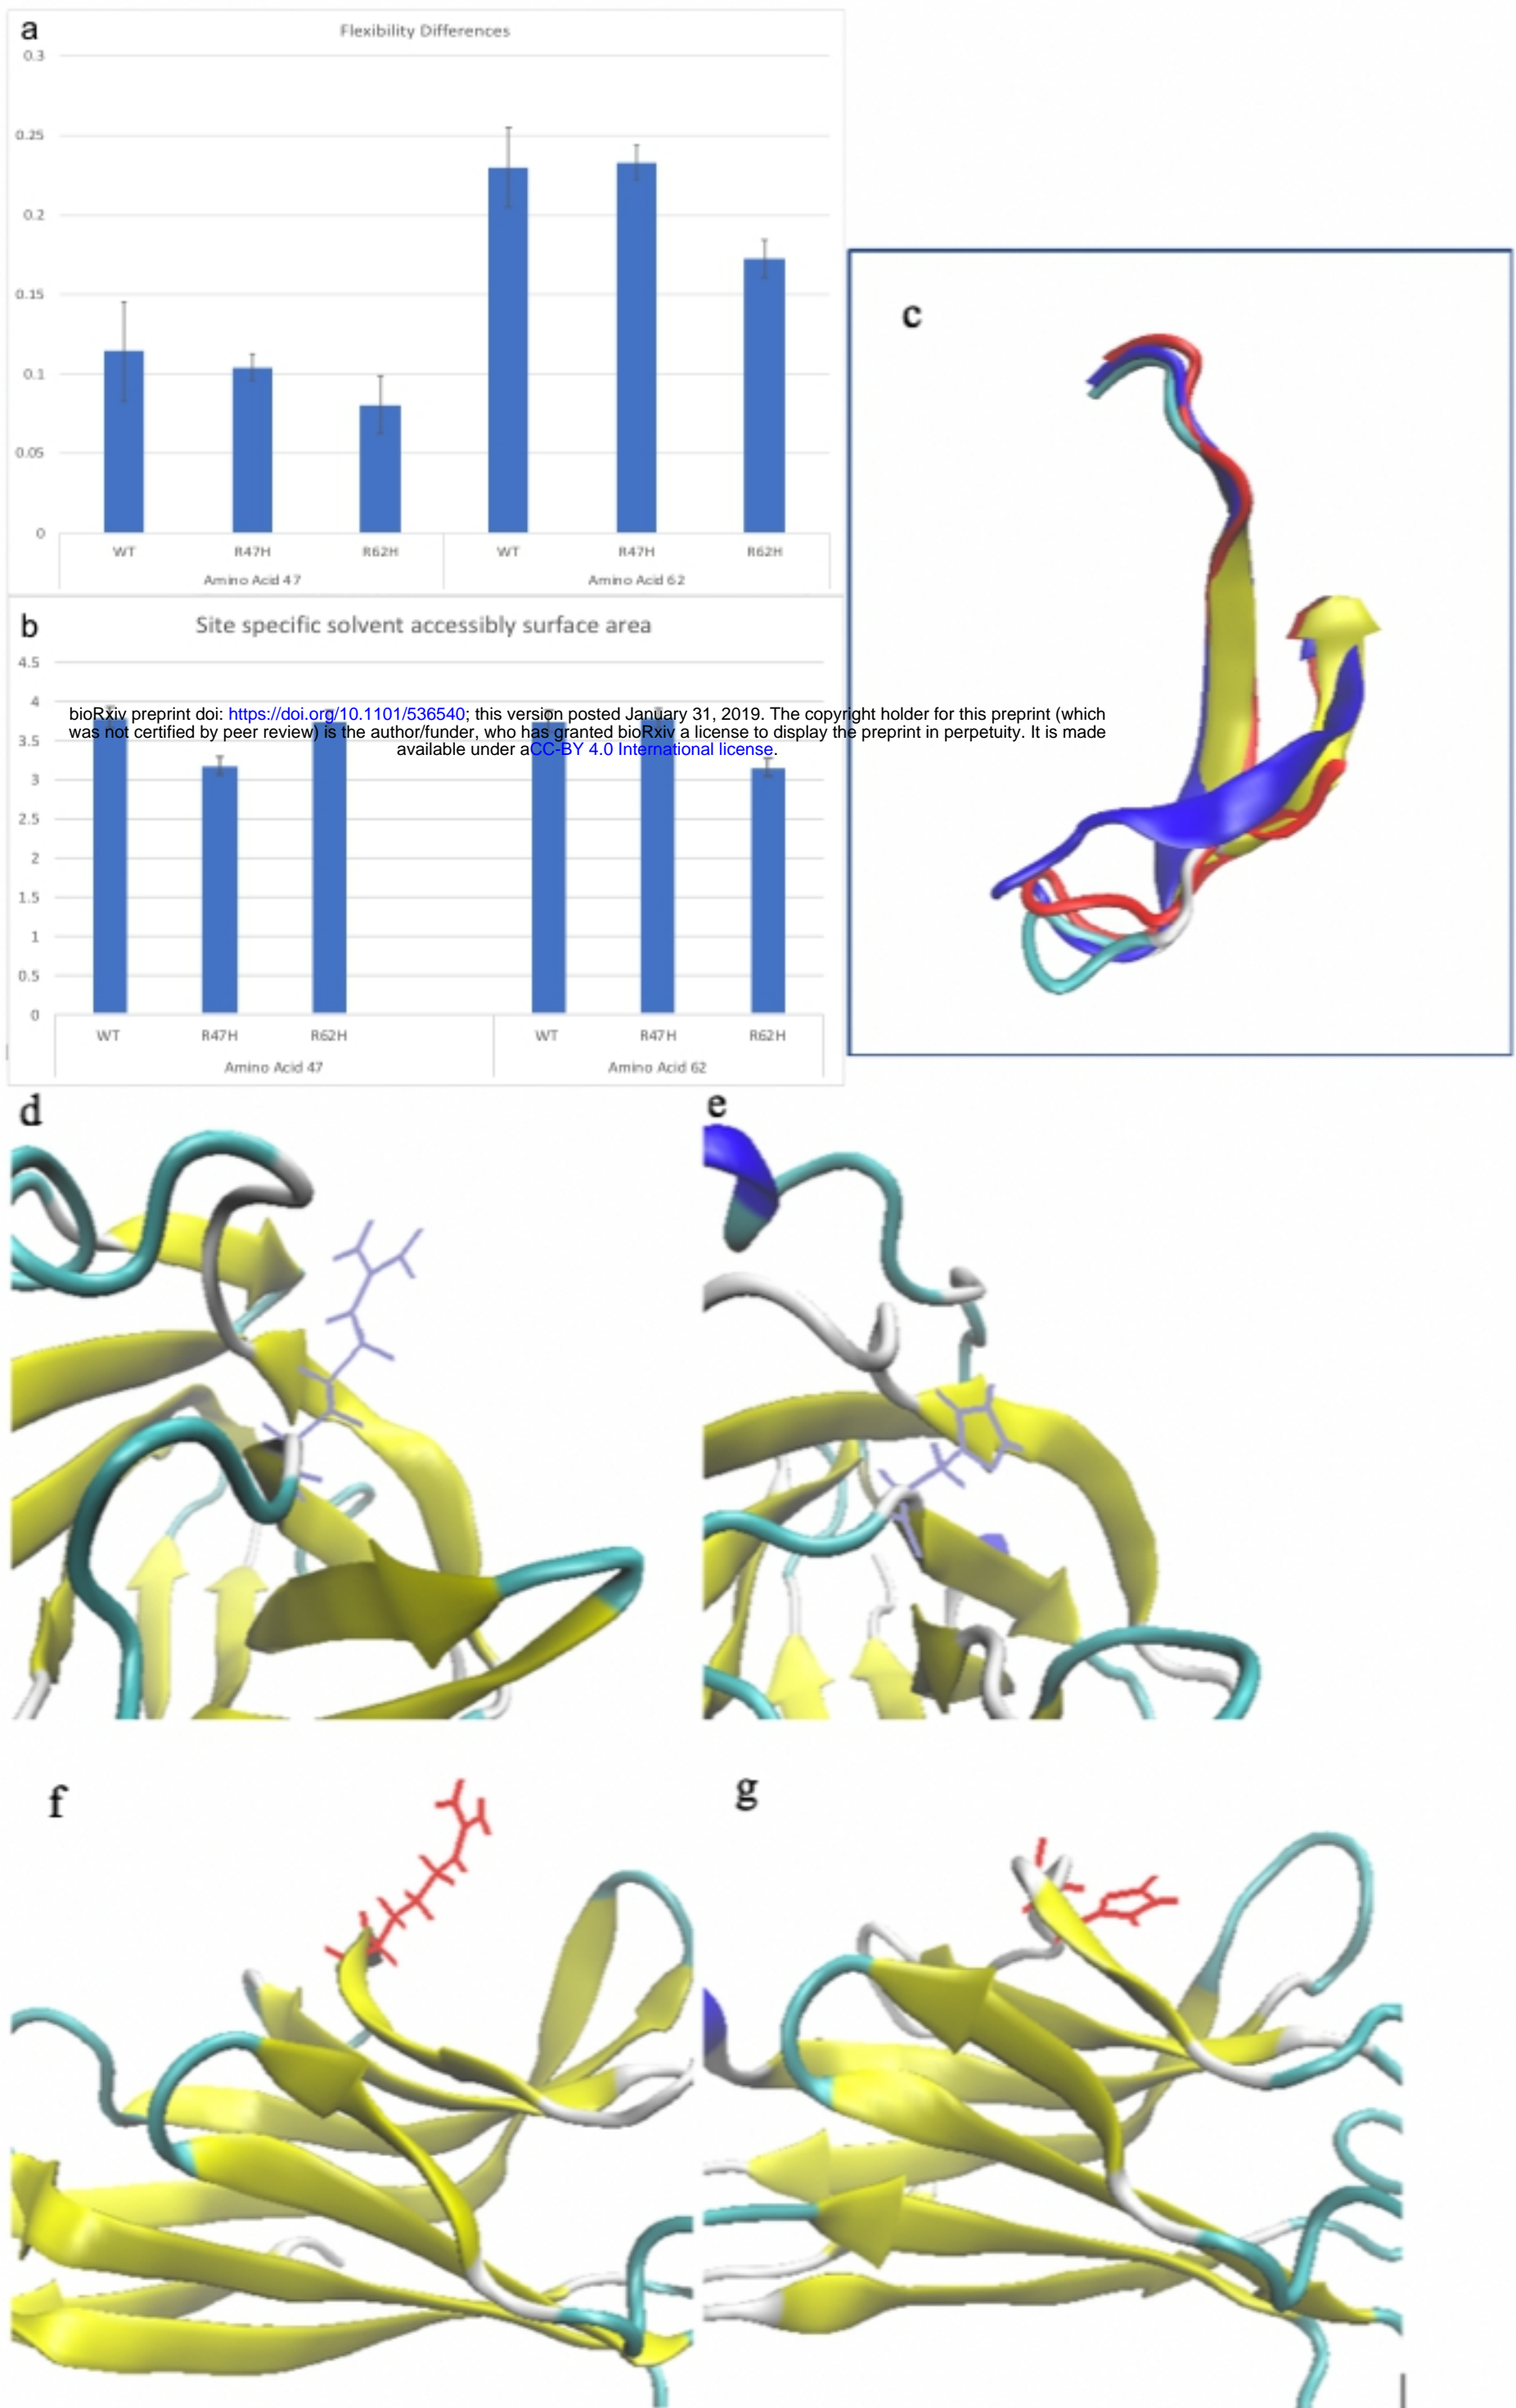

figure 3

a

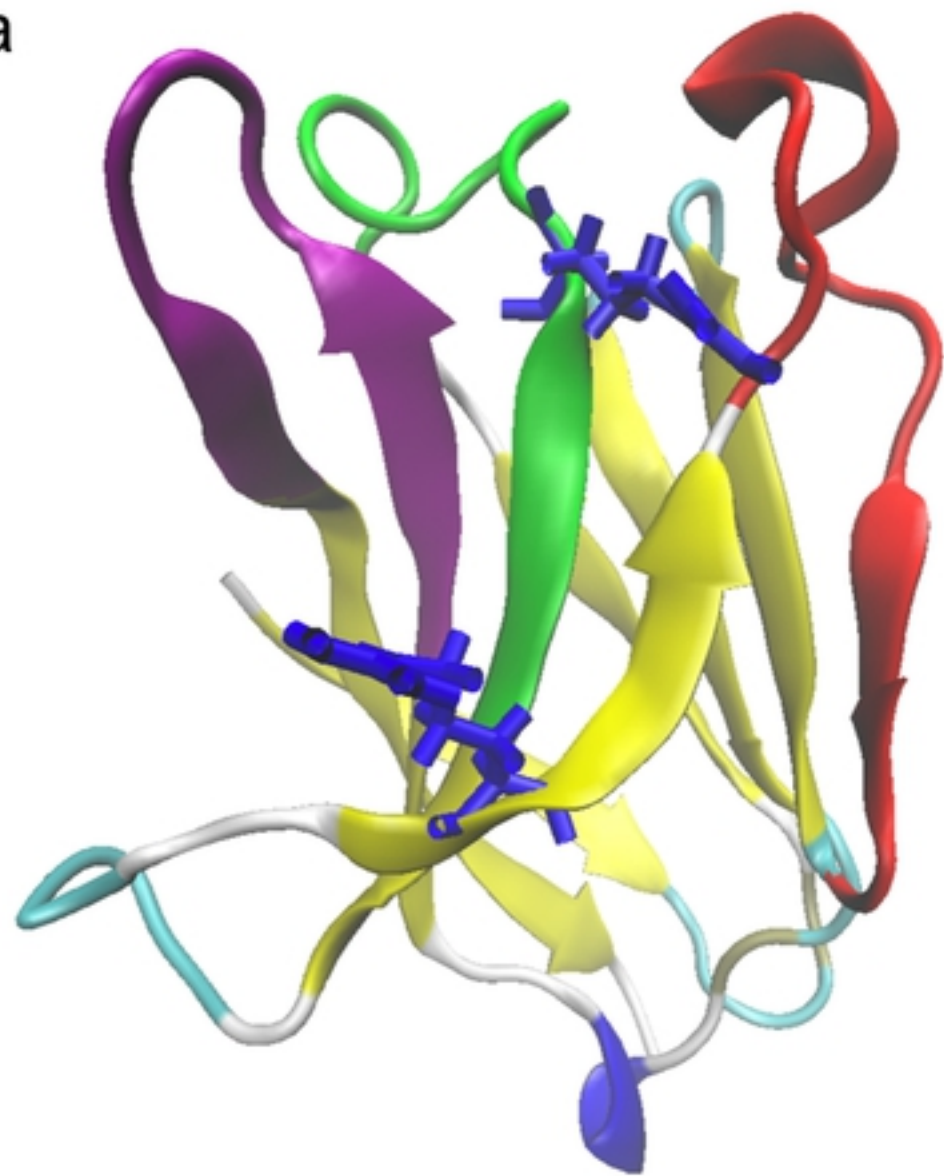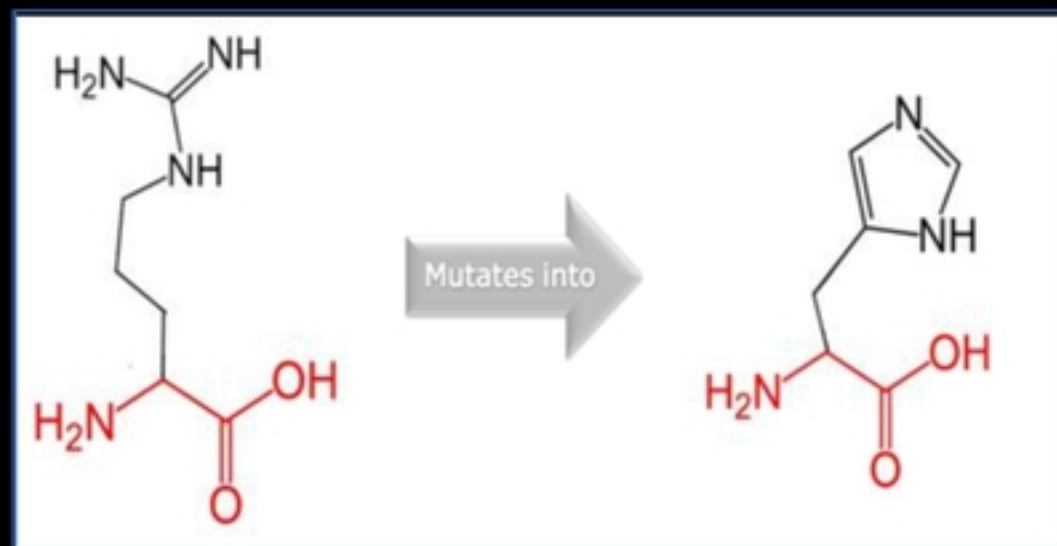

figure 2

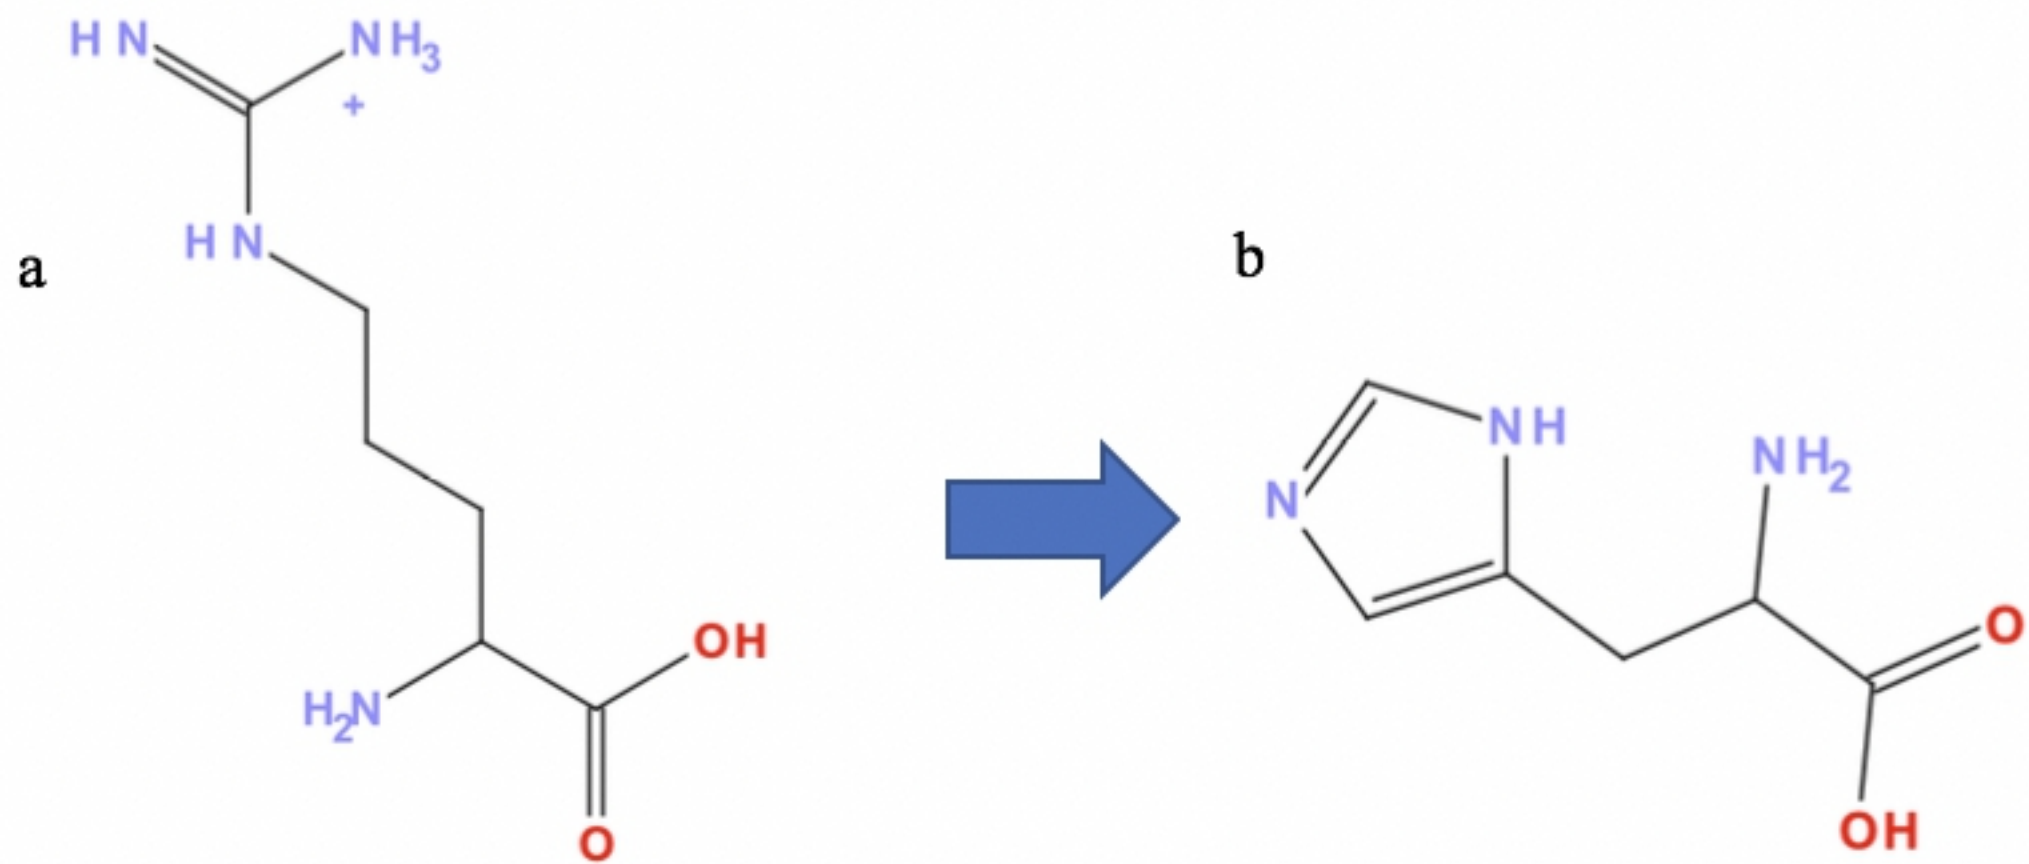

figure 1

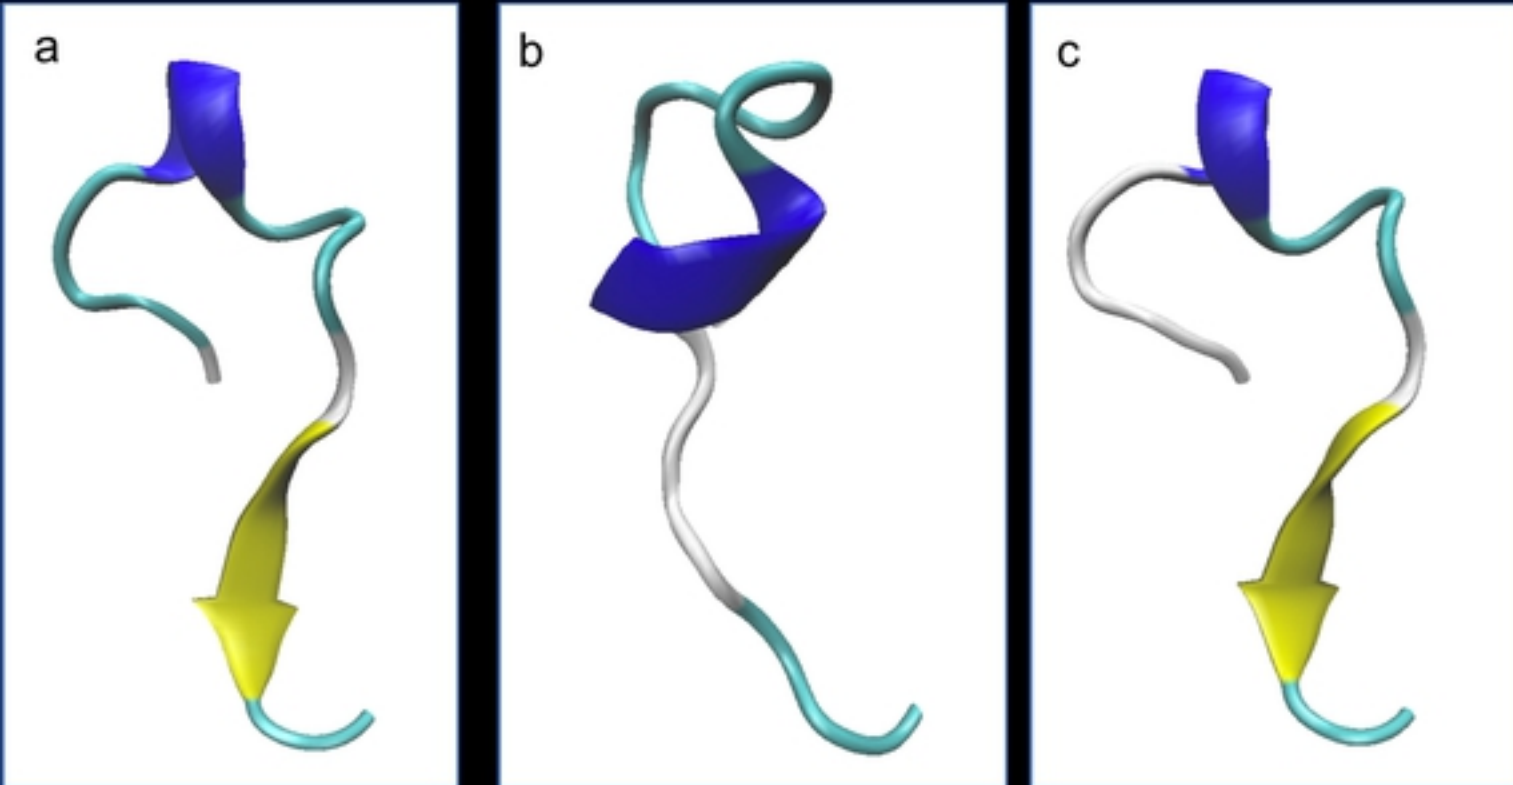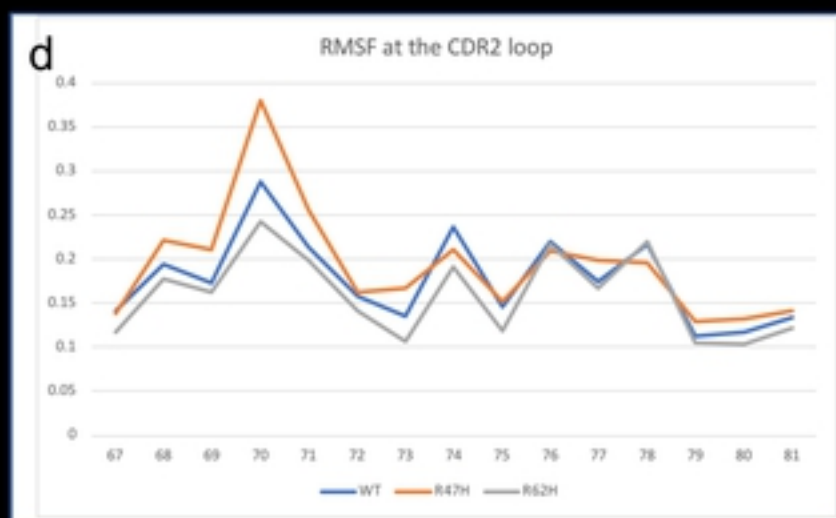

figure 4
